# Supplementary material for: Transplantability of a circadian clock to a noncircadian organism
Source: PubMed Central journal article supplement — Sci Adv. 2015 Jun 12;1(5):e1500358. doi: 10.1126/sciadv.1500358 (PMC4517858; doi:10.1126/sciadv.1500358), 2015-06-12
Supplement: NIHMS709660-supplement-Supplemental_Materials.pdf [file NIHMS709660-supplement-Supplemental_Materials.pdf]

## Supplementary Materials for **Transplantability of a circadian clock to a noncircadian organism**

Anna H. Chen, David Lubkowitz, Vivian Yeong, Roger L. Chang, Pamela A. Silver\*

Published 12 June 2015, *Sci. Adv.* **1**, e1500358 (2015)

DOI: 10.1126/sciadv.1500358

### **The PDF file includes:**

- Fig. S1. Plasmids built for reconstruction of the circadian oscillator in *E. coli*.
- Fig. S2. Additional data and quantifications of KaiC phosphorylation in *E. coli* expressing KaiABC.
- Fig. S3. Circadian phosphorylation of KaiC over time requires KaiA and KaiB.
- Fig. S4. Plasmids built for the synthetic oscillator utilizing a modified bacterial two-hybrid system.
- Fig. S5. KaiC and SasA phosphorylation states affect reporter output.
- Table S1. Raw data for Fig. 2D.
- Table S2. Bacterial strains and plasmids.

### **Other Supplementary Material for this manuscript includes the following:** (available at [www.advances.sciencemag.org/cgi/content/full/1/5/e1500358/DC1](http://www.advances.sciencemag.org/cgi/content/full/1/5/e1500358/DC1))

- Movie S1 (.mov format). Circadian oscillations visualized in single *E. coli* cells using a microfluidic device.

## Supplementary Materials:

### Supplemental Figures

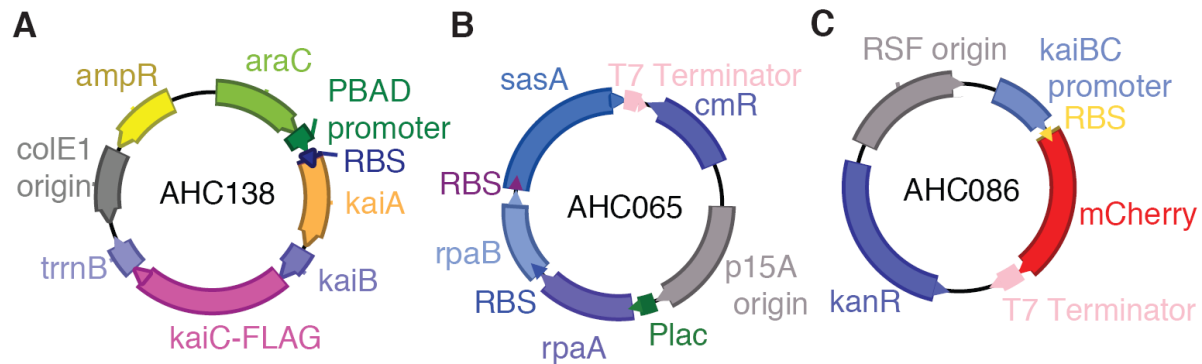

**Figure S1. Plasmids built for reconstruction of the circadian oscillator in *E. coli*.**

(A) Core oscillator components, *kaiABC*, are expressed in an operon driven by an arabinose inducible promoter. (B) Additional native cyanobacterial components, *sasA*, *rpaA*, *rpaB*, are expressed in a synthetic operon driven by an IPTG inducible promoter. (C) *mCherry* reporter is driven by a circadian responsive promoter, such as *kaiBC*.

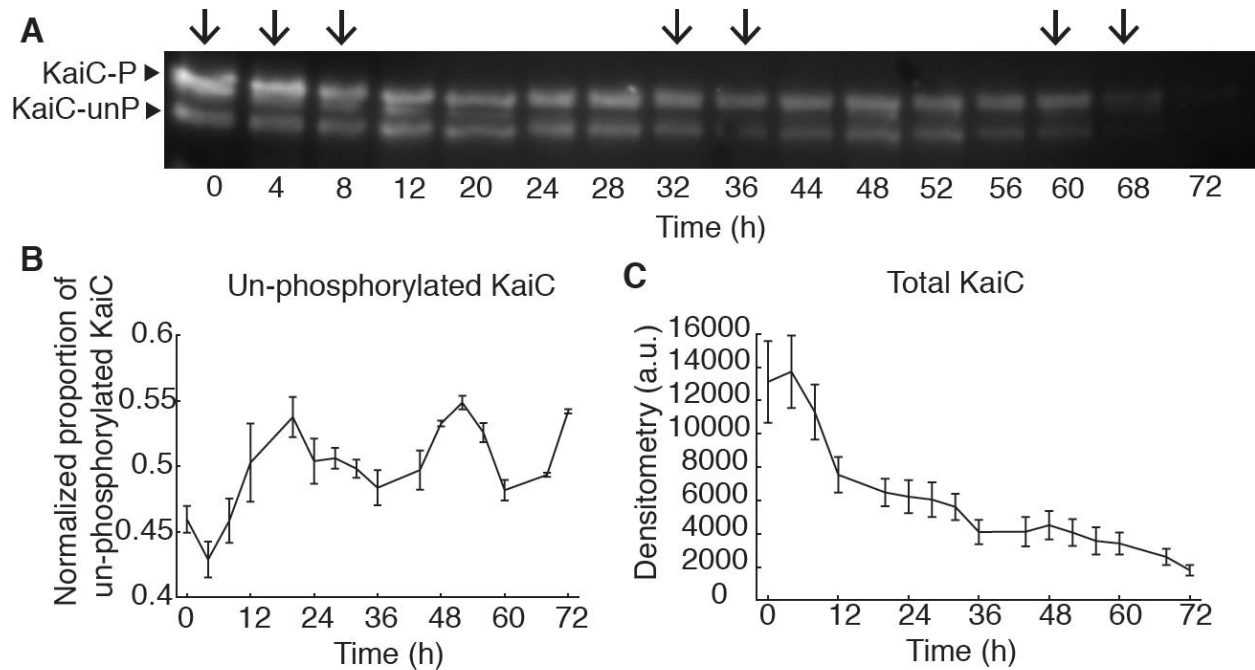

**Figure S2. Additional data and quantifications of KaiC phosphorylation in *E. coli* expressing KaiABC.**

(A) Western blots, which were quantified in Fig. 1D, show phosphorylated and unphosphorylated KaiC over time in *E. coli* coexpressing KaiA and KaiB. Time  $t=0$ h corresponds to synchronization. Arrows indicate timepoints with high proportion of phosphorylated KaiC. (B) Proportion of unphosphorylated KaiC over time in *E. coli* coexpressing KaiA and KaiB, after synchronization ( $t=0$ h). The mean ratio of unphosphorylated KaiC to total KaiC across biological replicates, mean normalized for each time-trace, is plotted. (C) Total KaiC quantified over time in *E. coli* co-expressing KaiA and KaiB, after synchronization ( $t=0$ h). No statistically significant oscillations were found when analyzed using RAIN ( $P=0.35$ ). Error bars, s.e.m. ( $n=3$ ).

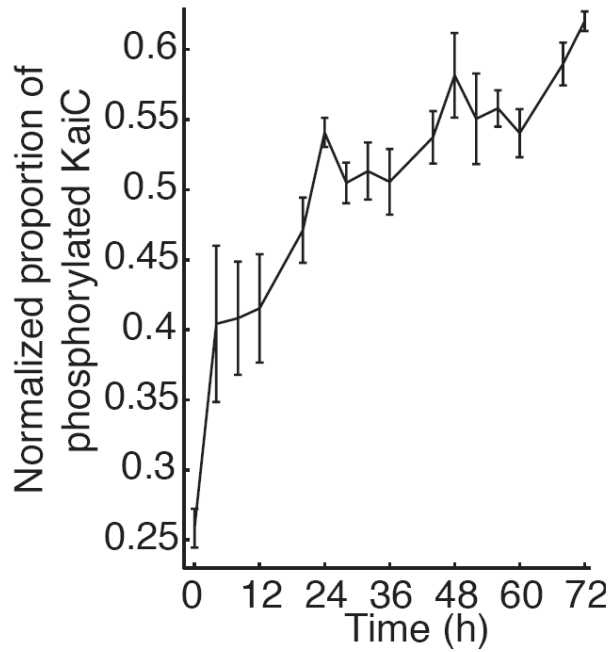

**Figure S3. Circadian phosphorylation of KaiC over time requires KaiA and KaiB.**

KaiC phosphorylation over time, after synchronization, in *E. coli* expressing only KaiC without other Kai clock components. The mean ratio of phosphorylated KaiC to total KaiC across three biological replicates, mean normalized for each time-trace, is plotted. Error bars, s.e.m. (n=3). Circadian oscillations were not statistically significant as analyzed by RAIN ( $P > 0.99$ ).

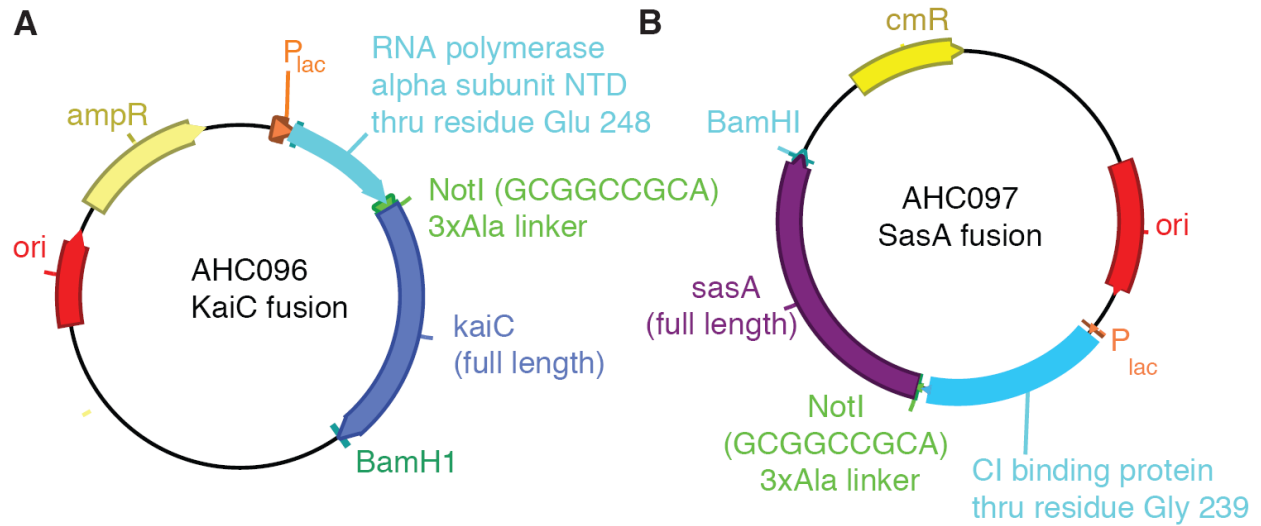

**Figure S4: Plasmids built for the synthetic oscillator utilizing a modified bacterial two-hybrid system**

(A) Plasmid expressing full length KaiC C-terminally fused to the  $\alpha$  subunit N-terminal domain of RNA polymerase (KaiC- $\alpha$ NTD). (B) Plasmid expressing full length SasA C-terminally fused to  $\lambda$ CI protein (SasA-CI). The two parts of the fusions are connected via 3X alanine linkers and their corresponding genes are driven by lac promoters.

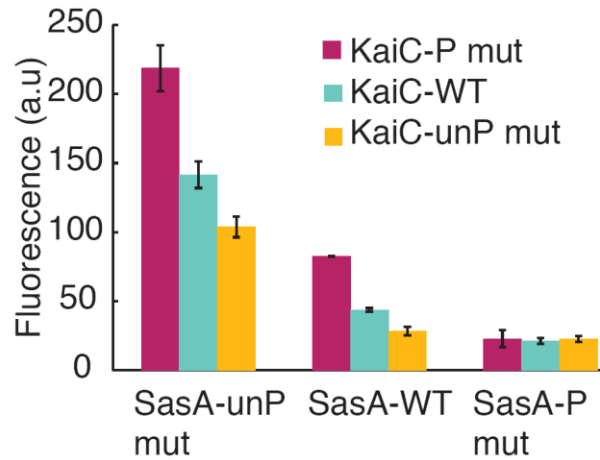

**Figure S5: KaiC and SasA phosphorylation states affect reporter output.**

OD normalized fluorescent reporter output of interactions between combinations of phosphomimic (-P mut, KaiC: S431A, T432E; SasA: H161D), non-phosphorylatable mutant (-unP mut, KaiC: S431A, T432A; SasA: H161A) and wild-type (WT) KaiC-  $\alpha$ NTD and SasA-CI.

Error bars, s.e.m. (n=3)

**Table S1 Raw data for Fig. 2D.**

| Time | Fluorescence |             |             |
|------|--------------|-------------|-------------|
|      | replicate 1  | replicate 2 | replicate 3 |
| 1    | 16.5298743   | -37.989606  | -18.859029  |
| 2    | 9.17214036   | -32.030356  | -23.132065  |
| 3    | 2.88513554   | -34.610537  | -27.914756  |
| 4    | 3.17460317   | -26.682346  | -25.12607   |
| 5    | 2.39940938   | -33.989081  | -27.952593  |
| 6    | 10.4375      | -30.440816  | -29.121372  |
| 7    | 19.1532258   | -26.778584  | -22.288246  |
| 8    | 11.4589335   | -25.411454  | -20.648536  |
| 9    | 11.5794952   | -23.843485  | -27.503581  |
| 10   | 19.9669421   | -23.81736   | -20.476034  |
| 11   | 11.0637163   | -27.436236  | -20.260251  |
| 12   | 12.0967742   | -17.495511  | -25.319834  |
| 13   | 13.1471944   | -20.691749  | -24.681413  |
| 14   | 15.1186441   | -20.88608   | -18.357907  |
| 15   | 17.0940171   | -20.380536  | -22.887026  |
| 16   | 12.8205128   | -11.787177  | -20.321454  |
| 17   | 18.5280494   | -15.845521  | -11.670214  |
| 18   | 21.9890055   | -16.734217  | -23.688132  |
| 19   | 12.0569086   | -13.683353  | -13.677615  |
| 20   | 17.1256654   | -8.6546374  | -11.183774  |
| 21   | 29.6686073   | -11.265066  | -15.745511  |
| 22   | 23.8523376   | -12.068371  | 2.67181753  |
| 23   | 17.1399594   | -3.4443579  | -3.1438061  |
| 24   | 16.4835165   | 3.96783718  | 11.767629   |
| 25   | -16.288796   | 4.87345564  | 6.54083332  |
| 26   | -13.413058   | 6.62623064  | 6.61988719  |
| 27   | -18.759824   | 6.0190977   | 10.0851131  |
| 28   | -16.273904   | 10.7170211  | 18.8553952  |
| 29   | 2.53569999   | 20.6133486  | 20.3001099  |
| 30   | -5.0505051   | 19.2628244  | 26.9689778  |
| 31   | 3.97381954   | 22.8753833  | 30.8825358  |
| 32   | 8.33333333   | 39.3017746  | 44.3178091  |
| 33   | 23.6963696   | 32.8105316  | 40.5225029  |
| 34   | 31.1625076   | 40.3775453  | 45.7233114  |
| 35   | 30.9193122   | 50.8189174  | 53.9602684  |
| 36   | 38.1355932   | 46.7314732  | 54.4222425  |
| 37   | 43.2481371   | 48.9319714  | 54.4018628  |
| 38   | 54.5685817   | 47.5982642  | 51.3467069  |
| 39   | 59.7117364   | 51.324421   | 58.6961962  |
| 40   | 73.8448845   | 47.7431077  | 53.3777483  |
| 41   | 72.0897833   | 54.1100268  | 47.7631232  |
| 42   | 82.2587817   | 53.9151737  | 45.5951135  |
| 43   | 80.9243552   | 46.5668307  | 42.3552629  |
| 44   | 86.0787465   | 32.1872365  | 37.9470991  |
| 45   | 82.6875969   | 31.27565    | 29.105205   |
| 46   | 84.0099609   | 23.8417993  | 12.5267343  |
| 47   | 83.1581734   | 12.7749376  | 5.52701572  |
| 48   | 80.6428893   | 15.0923995  | 2.5424188   |
| 49   | 70.575056    | -4.1829313  | -4.0683885  |
| 50   | 56.9307482   | -5.5846933  | -9.0240603  |
| 51   | 48.5938425   | -4.7895156  | -6.7092226  |
| 52   | 39.9149844   | -8.918424   | -4.0437291  |
| 53   | 31.1594203   | -13.033662  | -7.7499961  |
| 54   | 26.0746848   | -7.888933   | -3.0120124  |
| 55   | 28.838436    | -9.1611522  | 8.04145466  |
| 56   | 17.571764    | -2.0785048  | 13.3354077  |
| 57   | 20.791124    | -3.5061892  | 1.56066127  |
| 58   | 0.1546073    | -2.7176267  | 9.13702337  |
| 59   | 21.432212    | 4.98697154  | 6.25124341  |
| 60   | 23.7064928   | 6.57052831  | -1.3146147  |
| 61   | 19.8291731   | 6.36647407  | -2.0427165  |
| 62   | 18.979804    | 7.95140669  | 3.81916039  |
| 63   | 35.499436    | 19.5033197  | -9.1809275  |
| 64   | 32.86221     | 12.0007051  | -16.814713  |
| 65   | 43.44294     | 16.0723173  | -14.764842  |
| 66   | 26.7636479   | 12.4338231  | -15.337846  |
| 67   | 30.7363026   | 10.4385363  | -27.24003   |
| 68   | 59.1458779   | 11.978234   | -28.617678  |
| 69   | 53.6357544   | 5.82639909  | -18.566773  |
| 70   | 62.7539549   | 10.8418204  | -20.514412  |
| 71   | 58.3486671   | 15.2190976  | -18.115157  |
| 72   | 54.9997925   | 4.34796799  | -22.07229   |
| 73   | 46.8780327   | 1.84394444  | -21.675737  |
| 74   | 31.95251     | 0.31927359  | -30.624794  |
| 75   | 20.0404566   | 2.24881039  | -26.964285  |
| 76   | 8.81496195   | -0.6814817  | -28.162967  |
| 77   | 0.52764813   | -9.8476557  | -23.432994  |
| 78   | -9.9605632   | -14.586675  | -22.697126  |
| 79   | -11.977503   | -17.07131   | -11.175086  |
| 80   | -3.9155606   | -21.194207  | -8.6847944  |
| 81   | -10.44642    | -24.3239    | -10.762348  |
| 82   | 9.16548921   | -16.748502  | -9.1209008  |
| 83   | 11.0718623   | -18.442545  | 0.49892504  |
| 84   | 8.80489356   | -18.999236  | -1.4047515  |
| 85   | 18.6376381   | -29.084561  | -9.2788561  |
| 86   | 66.984227    | -28.395516  | -2.3372004  |
| 87   | 29.7186655   | -18.990072  | 1.33849634  |
| 88   | 28.4960883   | -27.829526  | -5.3052775  |
| 89   | 44.7383777   | -19.914695  | 0.88078363  |
| 90   | 56.6814267   | -20.462357  | 7.45559977  |
| 91   | 48.952395    | -18.993186  | -1.8872343  |
| 92   | 65.3518497   | -16.319075  | 3.45122792  |
| 93   | 62.8797898   | -11.057743  | 2.72668989  |
| 94   | 104.478081   | -15.817009  | 4.67080909  |
| 95   | 201.2486     | -6.097194   | 12.6376633  |
| 96   | 140.17761    | -6.6224112  | 6.03491311  |

**Table S2. Bacterial strains and plasmids.**

| Strain or plasmid      | Relevant genotype                                                                                      | Resistance | Reference        |
|------------------------|--------------------------------------------------------------------------------------------------------|------------|------------------|
| <i>E. coli strains</i> |                                                                                                        |            |                  |
| DH10B/Top10            | Expression strain                                                                                      |            | Invitrogen       |
| MG1655                 | Parent strain of DH10B for microfluidic device loading and growth                                      |            |                  |
| DP10                   | Variant of DH10B for arabinose induction                                                               |            | Kizer 2008       |
| <i>Plasmids</i>        |                                                                                                        |            |                  |
| AHC138                 | pBAD-kaiABC-FLAG                                                                                       | Amp        | This work        |
| AHC181                 | Phosphomutant variant of AHC138 with KaiC S431A, T432A                                                 | Amp        | This work        |
| AHC82                  | pTET kaiBC-6XHis                                                                                       | Kan        | This work        |
| AHC21                  | pBAD kaiA                                                                                              | Amp        | This work        |
| AHC20                  | pBAD-kaiABC                                                                                            | Amp        | This work        |
| AHC86                  | <i>kaiBC</i> promoter -mcherry                                                                         | Kan        | This work        |
| AHC65                  | plac-rpaA, rpaB, sasA                                                                                  | Cm         | This work        |
| AHC22                  | AHC20 $\Delta$ kaiA                                                                                    | Amp        | This work        |
| AHC165                 | AHC20 $\Delta$ kaiB                                                                                    | Amp        | This work        |
| AHC166                 | AHC20 $\Delta$ kaiC                                                                                    | Amp        | This work        |
| AHC163                 | AHC65 $\Delta$ rpaA                                                                                    | Cm         | This work        |
| AHC164                 | AHC65 $\Delta$ sasA                                                                                    | Cm         | This work        |
| AHC123                 | AHC65 $\Delta$ rpaB                                                                                    | Cm         | This work        |
| AHC170                 | AHC20 $\Delta$ kaiAC                                                                                   | Amp        | This work        |
| AHC171                 | AHC65 $\Delta$ SasA $\Delta$ RpaB                                                                      | Cm         | This work        |
| AHC172                 | AHC65 $\Delta$ RpaAB                                                                                   | Cm         | This work        |
| AHC85                  | AHC65 $\Delta$ SasA $\Delta$ RpaA                                                                      | Cm         | This work        |
| AHC205                 | AHC20 KaiC phosphomimic S431D T432D                                                                    |            |                  |
| AHC 140                | AHC65 RpaA phosphomimic D53E                                                                           | Cm         | This work        |
| AHC141                 | AHC65 Non-phosphorylatable RpaA D53A                                                                   | Cm         | This work        |
| AHC 142                | AHC65 RpaB phosphomimic D56E                                                                           | Cm         | This work        |
| AHC 143                | AHC65 Non-phosphorylatable RpaB D56A                                                                   | Cm         | This work        |
| AHC 144                | AHC65 SasA phosphomimic H161D                                                                          | Cm         | This work        |
| AHC 145                | AHC65 Non-phosphorylatable SasA H161A                                                                  | Cm         | This work        |
| pBR $\alpha$           | $P_{lacUV5}$ / $P_{pp}$ -directed synthesis of the full length $\alpha$ subunit of <i>E. coli</i> RNAP | Amp        | Dove et al. 1997 |
| pAC $\lambda$ CI       | $P_{lacUV5}$ -directed synthesis of the ICI protein                                                    | Cm         | Dove et al. 1997 |



|        |                                                                                                                                                                                                       |     |           |
|--------|-------------------------------------------------------------------------------------------------------------------------------------------------------------------------------------------------------|-----|-----------|
| AHC096 | <i>placUV5</i> - and <i>p/pp</i> -directed synthesis of the $\alpha$ NTD (residues 1-248 of the $\alpha$ subunit of <i>E. coli</i> RNAP) fused via three alanines to <i>S. elongatus</i> KaiC protein | Amp | This work |
| AHC097 | <i>P<sub>lacUV5</sub></i> -directed synthesis of the ICI protein fused via three alanines to <i>S. elongatus</i> SasA protein                                                                         | Cm  | This work |
| AHC157 | <i>placO<sub>L2</sub></i> driving 3x tandem sfGFP                                                                                                                                                     | Kan | This work |
| AHC177 | AHC096 Non-phosphorylatable KaiC S431A, T432A                                                                                                                                                         | Amp | This work |
| AHC178 | AHC096 KaiC phosphomimic S431D T432D                                                                                                                                                                  | Amp | This work |
| AHC179 | AHC097 Non-phosphorylatable SasA H161A                                                                                                                                                                | Cm  | This work |
| AHC180 | AHC097 Phosphomimic SasA H161D                                                                                                                                                                        | Cm  | This work |

---
